# Supplementary material for: Crystallization behavior, structure, morphology, and thermal properties of crystalline and amorphous stereo diblock copolymers, poly(l-lactide)-b-poly(dl-lactide)
Source: Royal Society of Chemistry journal article supplement (doi:10.1039/d0py01115k), 2020-01-01
Supplement: d0py01115k1.pdf [file d0py01115k1.pdf]

## Supplementary Information:

# Crystallization Behavior, Structure, Morphology, and Thermal Properties of Crystalline and Amorphous Stereo Diblock Copolymers, Poly(L-lactide)-*b*-Poly(DL-lactide)

*Hideto Tsuji, <sup>a\*</sup> Kazumasa Iguchi,<sup>a</sup> Kohji Tashiro,<sup>b</sup> and Yuki Arakawa<sup>a</sup>*

*<sup>a</sup>Department of Applied Chemistry and Life Science, Graduate School of Engineering,  
Toyohashi University of Technology, Tempaku-cho, Toyohashi, Aichi 441-8580, Japan*

*E-mail: [ht003@edu.tut.ac.jp](mailto:ht003@edu.tut.ac.jp)*

*<sup>b</sup>Department of Future Industry-Oriented Basic Science and Materials,  
Toyota Technological Institute, Tempaku, Nagoya 468-8511, Japan*

### Contents

- S1. <sup>1</sup>H NMR spectra of synthesized PLLA, PLLA-*b*-PDLLA, and PDLLA polymers (Figure S1)
- S2. Thermal properties of PLLA, PLLA-*b*-PDLLA, and PDLLA polymers for heating (Table S1)
- S3. Thermal properties of PLLA, PLLA-*b*-PDLLA, and PDLLA polymers for cooling (Table S2)
- S4. Magnified WAXD profiles (Cu-K $\alpha$ ) of PLLA, PLLA-*b*-PDLLA, and PDLLA polymers (Figure S2)
- S5. Structural parameters of PLLA and PLLA-*b*-PDLLAA polymers (Table S3)
- S6. Avrami plot of PLLA and PLLA-*b*-PDLLA polymers (Figure S3)
- S7. WAXD profiles (Mo-K $\alpha$ ) of PLLA and PLLA-*b*-PDLLA polymers (Figure S4)
- S8. WAXD half-width of PLLA and PLLA-*b*-PDLLA polymers (Table S4)

**S1.  $^1\text{H}$  NMR spectra of synthesized PLLA, PLLA-*b*-PDLLA, and PDLLA polymers (Figure S1)**

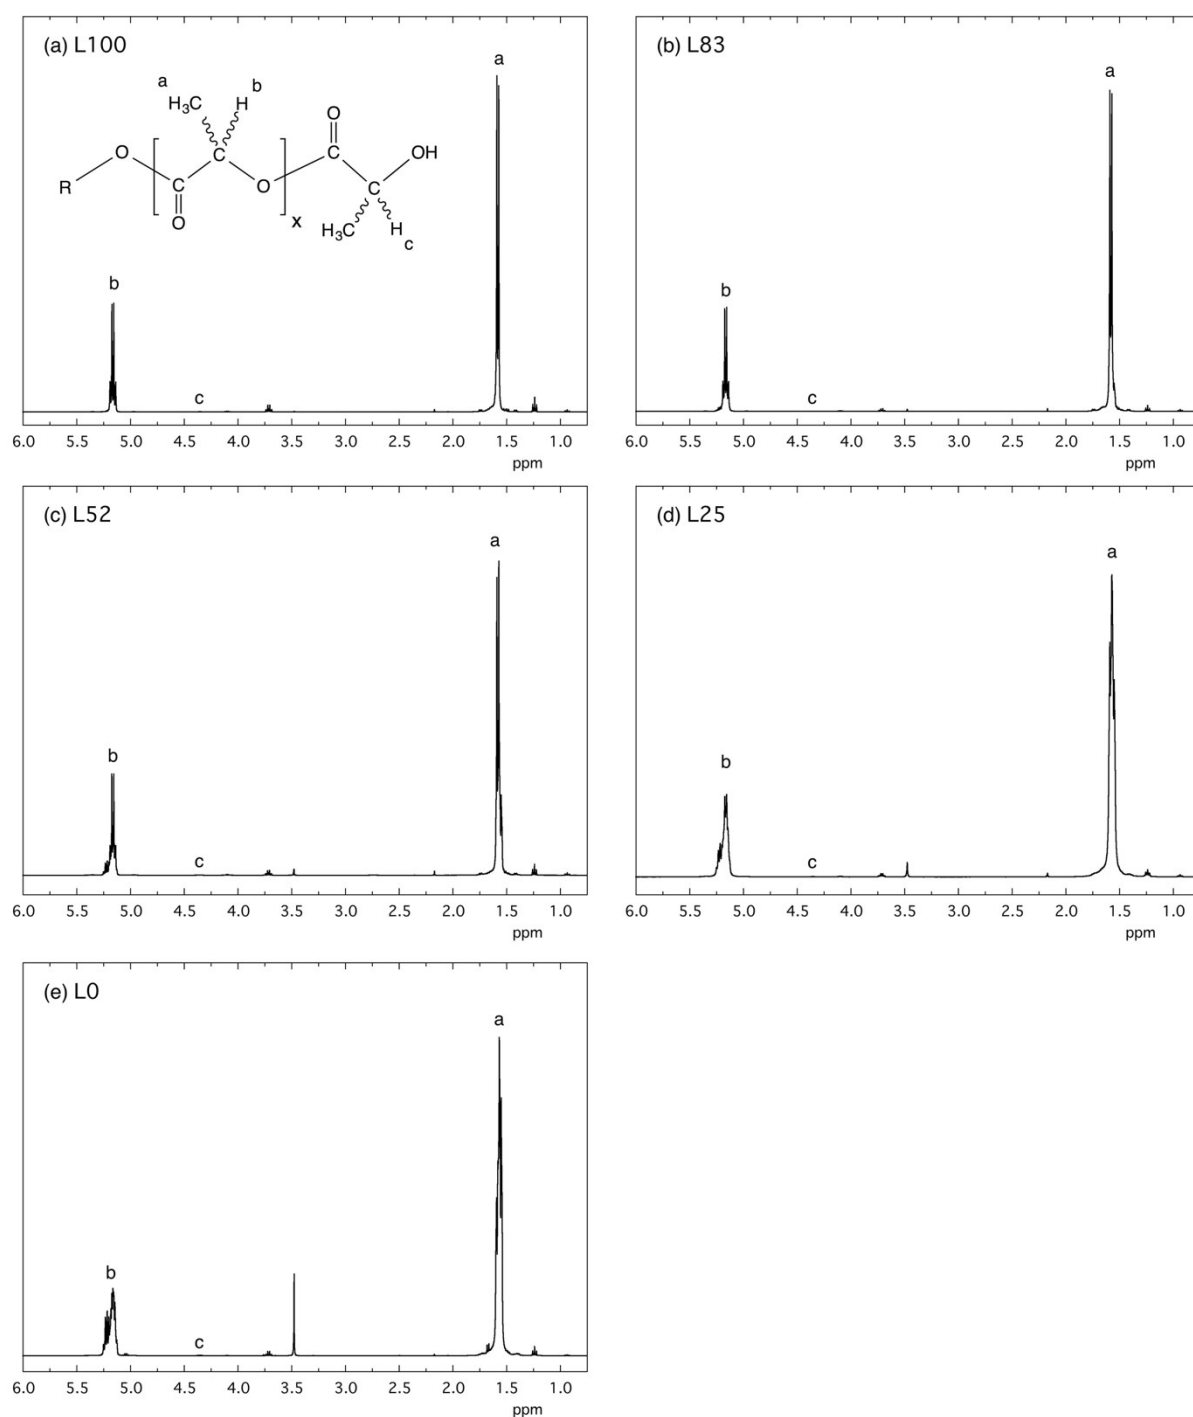

**Figure S1.**  $^1\text{H}$  NMR spectra of synthesized L100 (a), L83 (b), L852 (c), L25 (d), and L0 (e) polymers in  $\text{CDCl}_3$ . The peak at 3.5 ppm is ascribed to methyl proton of methanol remaining in polymers.

## S2. Thermal properties of PLLA, PLLA-*b*-PDLLA, and PDLLA polymers for heating (Table S1)

**Table S1.** Thermal properties of PLLA, PLLA-*b*-PDLLA, and PDLLA polymers for heating.

| Code | PLLA fraction (%) | Crystallization <sup>a)</sup> | $T_g$ <sup>b)</sup> (°C) | $T_{cc}$ <sup>b)</sup> (°C) | $T_m$ <sup>b)</sup> (°C)          | $\Delta H_{cc}$ <sup>c)</sup> (J g <sup>-1</sup> ) | $\Delta H_m$ <sup>c)</sup> (J g <sup>-1</sup> ) | $\Delta H(\text{tot})$ <sup>d)</sup> (J g <sup>-1</sup> ) |      |      |
|------|-------------------|-------------------------------|--------------------------|-----------------------------|-----------------------------------|----------------------------------------------------|-------------------------------------------------|-----------------------------------------------------------|------|------|
| L100 | 100               | SE                            | 47.5                     | 90.3                        | 173.9                             | -4.1                                               | 68.1                                            | 64.0                                                      |      |      |
|      |                   | Pr                            | 61.2                     |                             | 174.1                             |                                                    | 62.1                                            | 62.1                                                      |      |      |
|      |                   | MC (160°C)                    | 50.1                     |                             | 182.7 <sup>e)</sup>               |                                                    | 83.3                                            | 83.3                                                      |      |      |
|      |                   | MC (140°C)                    |                          |                             | 163.1, 176.0 <sup>e)</sup>        |                                                    | 79.2                                            | 79.2                                                      |      |      |
|      |                   | MC (120°C)                    |                          |                             | 171.7 <sup>e)</sup>               |                                                    | 68.0                                            | 68.0                                                      |      |      |
|      |                   | MC (110°C)                    |                          |                             | 172.0                             |                                                    | 68.8                                            | 68.8                                                      |      |      |
|      |                   | MC (100°C)                    |                          |                             | 165.6, <sup>f)</sup> 173.7        |                                                    | 63.7                                            | 63.7                                                      |      |      |
|      |                   | MC (90°C)                     |                          |                             | 164.0, <sup>f)</sup> 173.2        |                                                    | 52.9                                            | 52.9                                                      |      |      |
|      |                   | MC (80°C)                     |                          |                             | 135.4                             |                                                    | 162.7, <sup>f)</sup> 172.9                      | -5.0                                                      | 56.5 | 51.5 |
|      |                   | MC (0°C) <sup>g)</sup>        | 56.5                     |                             | 98.5                              |                                                    | 163.5, 173.1                                    | -59.8                                                     | 59.9 | 0.1  |
| L83  | 82.8              | SE                            |                          | 132.2                       | 170.0                             | -3.1                                               | 46.5                                            | 43.4                                                      |      |      |
|      |                   | Pr                            | 52.6                     |                             | 158.2, 169.4                      |                                                    | 38.5                                            | 38.5                                                      |      |      |
|      |                   | MC (160°C)                    | 49.2, 57.5               | 107.6, 155.1                | 164.6                             | -42.1                                              | 42.4                                            | 0.3                                                       |      |      |
|      |                   | MC (140°C)                    | 51.1                     |                             | 169.1 <sup>e)</sup>               |                                                    | 51.0                                            | 51.0                                                      |      |      |
|      |                   | MC (120°C)                    | 51.2                     |                             | 163.8, <sup>e)</sup> 169.7        |                                                    | 52.3                                            | 52.3                                                      |      |      |
|      |                   | MC (110°C)                    | 43.8                     |                             | 155.7, <sup>f)</sup> 168.6        |                                                    | 48.6                                            | 48.6                                                      |      |      |
|      |                   | MC (100°C)                    | 48.1, 56.3               |                             | 147.5, <sup>f)</sup> 168.6        |                                                    | 38.8                                            | 38.8                                                      |      |      |
|      |                   | MC (90°C)                     | 55.2                     | 149.7                       | 168.9                             | -5.3                                               | 40.8                                            | 35.5                                                      |      |      |
|      |                   | MC (80°C)                     | 52.0                     | 148.0                       | 169.0                             | -7.0                                               | 44.6                                            | 37.6                                                      |      |      |
|      |                   | MC (0°C) <sup>g)</sup>        | 54.6                     | 107.9, 154.2                | 168.1                             | -40.3                                              | 41.5                                            | 1.2                                                       |      |      |
| L52  | 52.4              | SE                            | 43.9                     | 99.2                        | 163.9                             | -9.7                                               | 26.5                                            | 16.8                                                      |      |      |
|      |                   | Pr                            | 50.2                     |                             | 154.8, 164.4                      |                                                    | 35.5                                            | 35.5                                                      |      |      |
|      |                   | MC (160°C)                    | 48.4, 56.1               | 125.7                       | 154.5, 163.1                      | -24.7                                              | 25.5                                            | 0.8                                                       |      |      |
|      |                   | MC (140°C)                    | 48.0                     |                             | 162.1 <sup>e)</sup>               |                                                    | 36.1                                            | 36.1                                                      |      |      |
|      |                   | MC (120°C)                    | 50.6                     |                             | 156.9, <sup>e)</sup> 163.6        |                                                    | 27.6                                            | 27.6                                                      |      |      |
|      |                   | MC (110°C)                    | 47.2                     |                             | 126.0, 154.2, <sup>e)</sup> 163.1 |                                                    | 29.3                                            | 29.3                                                      |      |      |
|      |                   | MC (100°C)                    | 45.4                     |                             | 119.9, 151.7, <sup>e)</sup> 163.3 |                                                    | 31.4                                            | 31.4                                                      |      |      |
|      |                   | MC (90°C)                     | 42.1, 54.2               | 148.0                       | 108.7, 163.4                      | -2.0                                               | 29.1                                            | 27.1                                                      |      |      |
|      |                   | MC (80°C)                     | 51.9                     | 144.5                       | 163.1                             | -3.9                                               | 28.4                                            | 24.5                                                      |      |      |
|      |                   | MC (0°C) <sup>g)</sup>        | 53.6                     | 125.9                       | 154.5, 163.2                      | -24.8                                              | 25.0                                            | 0.2                                                       |      |      |
| L25  | 25.4              | SE                            | 41.0, 49.1               | 107.6                       | 147.8                             | -4.0                                               | 4.4                                             | 0.4                                                       |      |      |
|      |                   | Pr                            | 52.8                     | 114.4                       | 144.1, 154.9                      | -1.0                                               | 11.1                                            | 10.1                                                      |      |      |
|      |                   | MC (160°C)                    | 48.1, 54.8               |                             |                                   |                                                    |                                                 |                                                           |      |      |
|      |                   | MC (140°C)                    | 49.1                     |                             | 152.4                             |                                                    | 0.7                                             | 0.7                                                       |      |      |
|      |                   | MC (120°C)                    | 48.5                     |                             | 131.5, <sup>e)</sup> 142.9, 148.6 |                                                    | 11.9                                            | 11.9                                                      |      |      |
|      |                   | MC (110°C)                    | 46.6                     |                             | 124.2, <sup>e)</sup> 138.9, 146.6 |                                                    | 13.8                                            | 13.8                                                      |      |      |
|      |                   | MC (100°C)                    | 47.7                     |                             | 116.7, <sup>e)</sup> 135.7, 144.5 |                                                    | 13.2                                            | 13.2                                                      |      |      |
|      |                   | MC (90°C)                     | 45.3, 53.2               |                             | 108.2, <sup>e)</sup> 131.8, 144.5 |                                                    | 11.2                                            | 11.2                                                      |      |      |
|      |                   | MC (80°C)                     | 50.4                     |                             | 146.5                             |                                                    | 8.2                                             | 8.2                                                       |      |      |
|      |                   | MC (0°C) <sup>g)</sup>        | 50.2                     |                             |                                   |                                                    |                                                 |                                                           |      |      |
| L0   | 0                 | SE                            | 10.1                     |                             |                                   |                                                    |                                                 |                                                           |      |      |
|      |                   | Pr                            | 29.1                     |                             |                                   |                                                    |                                                 |                                                           |      |      |
|      |                   | MC (160°C)                    | 45.9                     |                             |                                   |                                                    |                                                 |                                                           |      |      |
|      |                   | MC (140°C)                    | 52.4                     |                             |                                   |                                                    |                                                 |                                                           |      |      |
|      |                   | MC (120°C)                    | 47.9                     |                             |                                   |                                                    |                                                 |                                                           |      |      |
|      |                   | MC (110°C)                    | 47.8                     |                             |                                   |                                                    |                                                 |                                                           |      |      |
|      |                   | MC (100°C)                    | 48.7                     |                             |                                   |                                                    |                                                 |                                                           |      |      |
|      |                   | MC (90°C)                     | 45.7                     |                             |                                   |                                                    |                                                 |                                                           |      |      |
|      |                   | MC (80°C)                     | 48.4                     |                             |                                   |                                                    |                                                 |                                                           |      |      |
|      |                   | MC (0°C) <sup>g)</sup>        | 48.9                     |                             |                                   |                                                    |                                                 |                                                           |      |      |

<sup>a)</sup> SE, Pr, and MC indicate that the samples were prepared correspondingly by solvent-evaporation, precipitation, and melt-crystallization at shown  $T_c$ .

<sup>b)</sup>  $T_g$ ,  $T_{cc}$ , and  $T_m$  are glass transition, cold crystallization, and melting temperatures, respectively.

<sup>c)</sup>  $\Delta H_{cc}$  and  $\Delta H_m$  cold crystallization and melting enthalpies, respectively.

<sup>d)</sup>  $\Delta H(\text{tot}) = \Delta H_{cc} + \Delta H_m$ . <sup>e)</sup>  $T_m$  values of  $\alpha$ -form used to obtain  $T_m^0$  values. <sup>f)</sup>  $T_m$  values of  $\delta$ -form used to obtain  $T_m^0$  values.

<sup>g)</sup> Melt-quenched samples.

### S3. Thermal properties of PLLA, PLLA-*b*-PDLLA, and PDLLA polymers for cooling (Table S2)

**Table S2.** Thermal properties of PLLA/PDLA, PLLA-*b*-PDLLA blends, and PDLLA for cooling.

| Code | PLLA fraction (%) | $T_c^a$ (°C) | $\Delta H_c^b$ (J g <sup>-1</sup> ) |
|------|-------------------|--------------|-------------------------------------|
| L100 | 100               | 117.8        | -55.6                               |
| L83  | 82.8              | 105.3        | -35.5                               |
| L52  | 52.4              |              |                                     |
| L25  | 25.4              |              |                                     |
| L0   | 0                 |              |                                     |

<sup>a)</sup> Crystallization temperature.

<sup>b)</sup> Crystallization enthalpy.

#### S4. Magnified WAXD profiles (Cu-K $\alpha$ ) of PLLA and PLLA-*b*-PDLLA polymers (Figure S2)

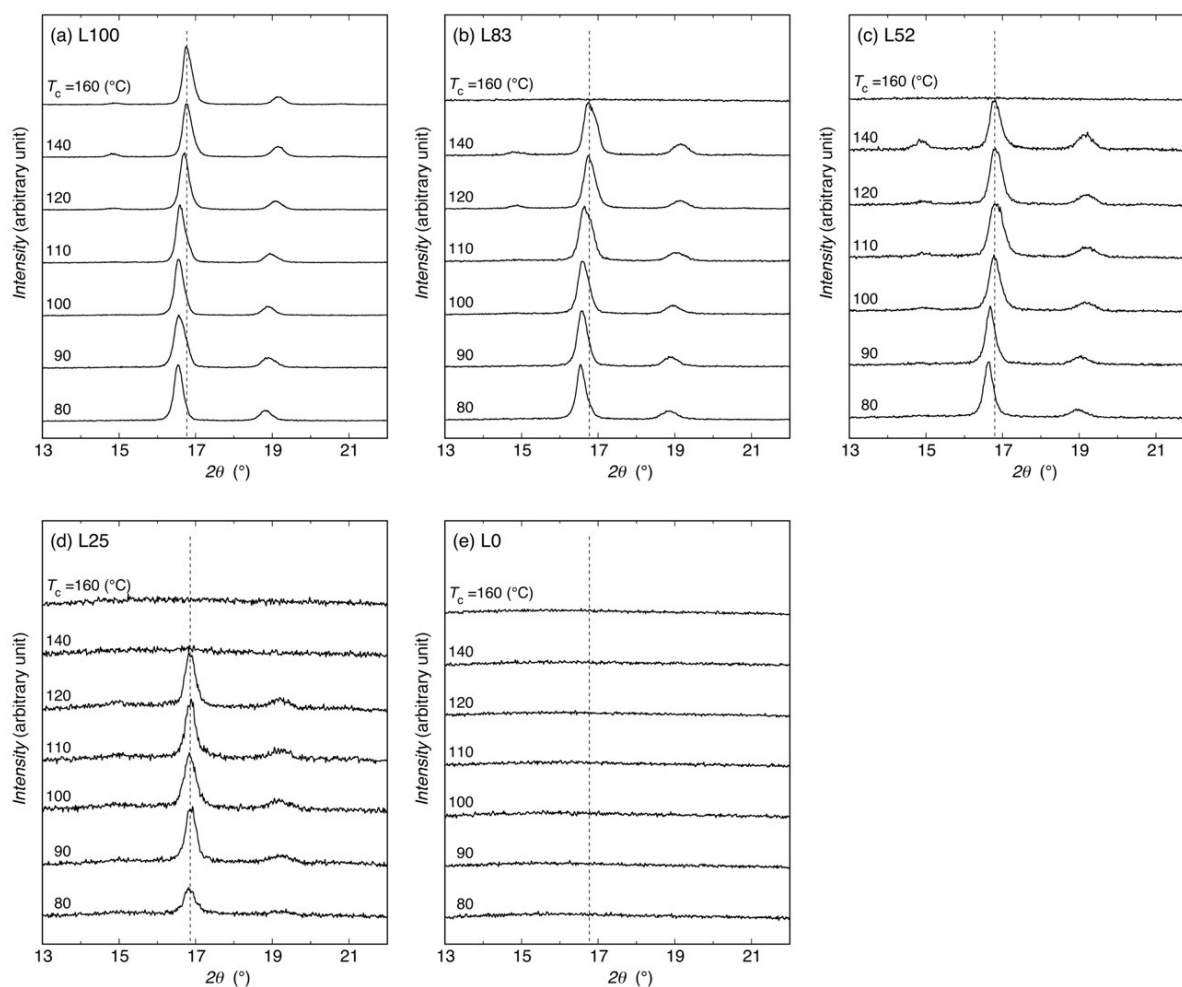

**Figure S2.** Magnified WAXD profiles ( $2\theta$  range of 13–22°, Cu-K $\alpha$ ) of PLLA (L100) (a), PLLA-*b*-PDLLA polymers, L83 (b), L52 (c), L25 (d), and PDLLA (L0) (e) crystallized at different crystallization temperature ( $T_c$ ) values from the melt.

## S5. Structural parameters of PLLA and PLLA-*b*-PDLLA polymers (Table S3)

**Table S3.** Structural parameters of PLLA and PLLA-*b*-PDLLA polymers crystallized at 130°C for 10h from the melt.

| Code | PLLA fraction (%) | $L^a$ (Å) | $d_c^b$ (Å) | $d_a^c$ (Å) | $d_{tr}^d$ (Å) | $X_c$ (%) |
|------|-------------------|-----------|-------------|-------------|----------------|-----------|
| L100 | 100               | 168.2     | 83.5        | 84.7        | 32.2           | 68.1      |
| L83  | 82.8              | 182.2     | 90.4        | 91.8        | 34.9           | 51.9      |
| L52  | 52.4              | 231.5     | 116.4       | 115.1       | 44.5           | 36.3      |
| L25  | 25.4              | 270.5     | 137.3       | 133.2       | 51.3           | 19.6      |

a) Long period.

b) Mean lamellar thickness.

c) Mean thickness of amorphous layer.

d) Mean thickness of transition layer between the crystalline and amorphous layers.

**S6. Avrami plot of PLLA and PLLA-*b*-PDLLA polymers (Figure S3)**

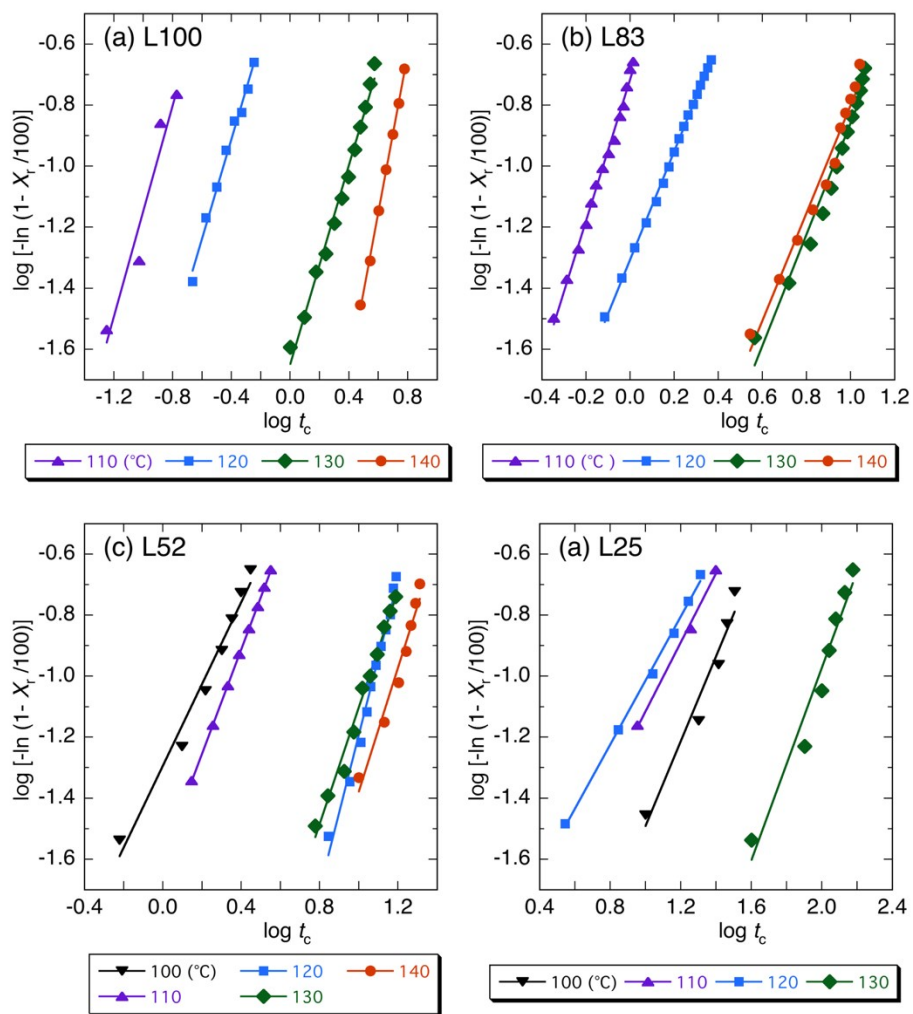

**Figure S3.** Avrami plot of PLLA (L100) (a), PLLA-*b*-PDLLA polymers, L83 (b), L52 (c), and L25 (d) crystallized at different crystallization temperature ( $T_c$ ) values from the melt.

S7. WAXD profiles (Mo-K $\alpha$ ) of PLLA and PLLA-*b*-PDLLA polymers (Figure S4)

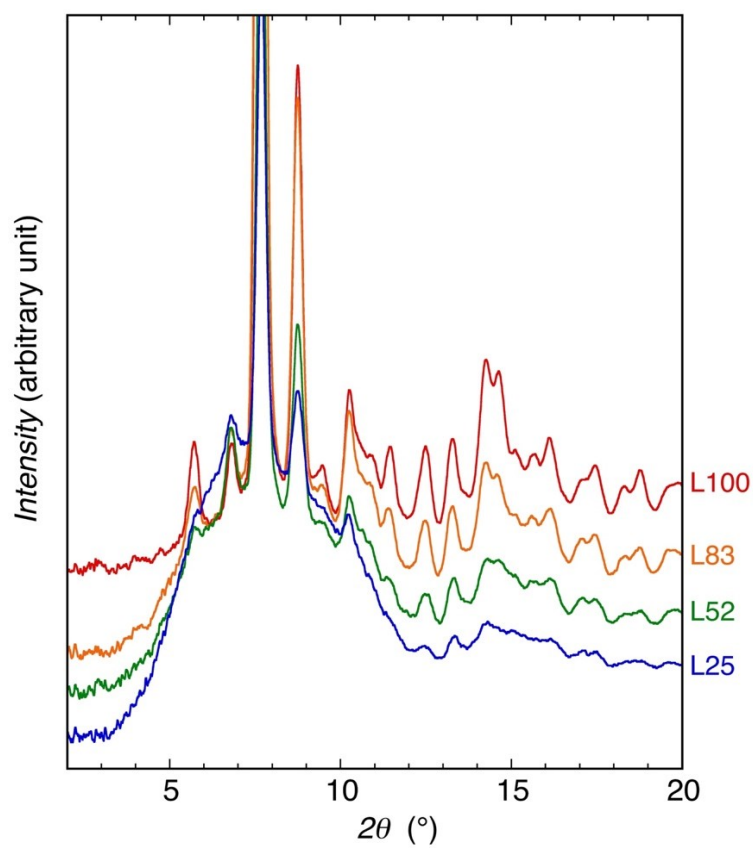

**Figure S4.** WAXD profiles (Mo-K $\alpha$ ) of PLLA, PLLA-*b*-PDLLA polymers crystallized at 130°C for 10 h from the melt.



**S8. WAXD half-width of PLLA and PLLA-*b*-PDLLA polymers (Table S4)**

**Table S4.** WAXD half-width of PLLA and PLLA-*b*-PDLLA polymers (113/203) obtained from Figure S4.

| Code | PLLA fraction (%) | Half-width (°) |
|------|-------------------|----------------|
| L100 | 100               | 0.299          |
| L83  | 82.8              | 0.322          |
| L52  | 52.4              | 0.348          |
| L25  | 25.4              | 0.355          |
